# Supplementary material
Source: MDPI journal article supplement (https://www.mdpi.com/2311-7524/9/8/931)
Supplement: s1 [file s1]

Archive with 3 entries (3 files):
- Supplemental Figure.pdf
- Supplemental Table S1-S5.pdf
- Supplemental Table S6.xlsx
