# Supplementary material
Source: MDPI journal article supplement (https://www.mdpi.com/2311-7524/9/8/931)
Supplement: s1 [file s1 › Supplemental Table S1-S5.pdf]

Table S1. 40 grape germplasm resources.

| Number | Varieties          | Type             | Genotype name | Location/source   |
|--------|--------------------|------------------|---------------|-------------------|
| 1      | Niagara Rosada     | Wine grape       | VL            | America           |
| 2      | Benizuiho          | Table grape      | VL            | China (Zhengzhou) |
| 3      | Vitis × Champion   | Wine grape       | AM            | China (Zhengzhou) |
| 4      | Cuihongputao       | Wine grape       | AM            | China (Zhengzhou) |
| 5      | Seibel Blanc       | Wine grape       | VL            | China (Zhengzhou) |
| 6      | Lot Sand           | Wine grape       | AM            | China (Zhengzhou) |
| 7      | Damubo             | Wine grape       | VL            | China (Zhengzhou) |
| 8      | Aromatic Rachachi  | Table grape      | VI            | China (Zhengzhou) |
| 9      | Pollux grape       | Table grape      | VL            | China (Zhengzhou) |
| 10     | Anisky grapes      | Wine grape       | VL            | America           |
| 11     | Green beads        | Table grape      | VL            | China (Zhengzhou) |
| 12     | Augusta            | Table grape      | VI            | Rumania           |
| 13     | Jifeng             | Table grape      | VL            | China (Zhengzhou) |
| 14     | Grand Noir         | Wine grape       | VI            | France            |
| 15     | Shenmei            | Table grape      | VL            | China (Shanghai)  |
| 16     | Jiangsu v. azulene | Wine grape       | AW            | China             |
| 17     | Shenye             | Table grape      | VL            | China (Shanghai)  |
| 18     | Shenhua            | Table grape      | VI            | China (Shanghai)  |
| 19     | Cabernet Sauvignon | Wine grape       | VI            | France            |
| 20     | Fuerjiadun         | Wine grape       | VI            | The Soviet union  |
| 21     | Baishengbi         | Table grape      | VI            | Europe            |
| 22     | Xinya              | Wine grape       | VI            | China (Xinjiang)  |
| 23     | Yongyou NO1        | Table grape      | VL            | China (Beijing)   |
| 24     | Molixiang          | Table grape      | VL            | China (Liaoning)  |
| 25     | Yan 74             | Table grape      | VI            | China (Shandong)  |
| 26     | Shine Muscat       | Table grape      | VL            | Japan             |
| 27     | Fujiminori         | Table grape      | VL            | Japan             |
| 28     | Italy grape        | Table grape      | VI            | Hungary           |
| 29     | SO4                | Rootstocks grape | AM            | Germany           |
| 30     | Wuhecuiobao        | Table grape      | VI            | China (Shanxi)    |
| 31     | Jumeigui           | Table grape      | VL            | China (Liaoning)  |
| 32     | Kyoho              | Table grape      | VL            | Japan             |
| 33     | Muscat Hamburg     | Table grape      | VI            | MK                |
| 34     | Thompson Seedless  | Table grape      | VI            | China (Xinjiang)  |
| 35     | Shuanghong         | Wine grape       | AW            | China (Beijing)   |
| 36     | 1103P              | Rootstocks grape | AM            | Italy             |
| 37     | Shenbao            | Table grape      | VL            | China (Shanghai)  |
| 38     | Hakuho             | Table grape      | VL            | Japan             |
| 39     | Beta               | Rootstocks grape | AM            | America           |
| 40     | Rui'du'xangyu      | Table grape      | VI            | China (Beijing)   |

\*VL: *V. vinifera* × *V. labrusca*, VI: *V. vinifera* L., VA: *V. vinifera* × *V. amurensis*, AM: American wild grapes, AW: Asian wild grapes,

Table S2 Sequence of primers used for the SSR and expression validation

| No. | Marker       | Family      | Forward (5' to 3')                | Reverse (5' to 3')                 |
|-----|--------------|-------------|-----------------------------------|------------------------------------|
| 1   | VMIRSSR156c1 | Vvi-MIR156c | TGAGTGAACCTGAGGTGC<br>CTGCTA      | TGTATGGGAGTTACAAATGGTAA<br>GGAATA  |
| 2   | VMIRSSR157c2 | Vvi-MIR157c | TAAGTGGAAGCCCTAAGG<br>AAGAAGAAAAA | GAAAGAGGAAGGCACTGGTGAT<br>GTTG     |
| 3   | VMIRSSR159f2 | Vvi-MIR159f | CCGCTACATTAGTTGTTAT<br>AATATCGT   | CTTCTTGACTTGTAATTTGGTTT<br>GA      |
| 4   | VMIRSSR160c1 | Vvi-MIR160c | AGGCATAAAGGGAAAGA<br>GGATTGGT     | GTGGCGTCCGTGGAAACTGATA<br>T        |
| 5   | VMIRSSR164b1 | Vvi-MIR164b | TAAGCCAAACAGAAGCTA<br>CTGTAAGT    | TGACCATCTCAACCCAATAATAC<br>TTT     |
| 6   | VMIRSSR167c3 | Vvi-MIR167c | TCTTCCCCTTGATAATTT<br>ATTATGTTG   | CATGATCTGATCTTTCCTTGACT<br>TG      |
| 7   | VMIRSSR169d1 | Vvi-MIR169d | AGGTTGATGAGGGTGATG<br>GTGGTTT     | CTAGTGAATGATATTAAGTTTAT<br>GCTGGTA |
| 8   | VMIRSSR171b1 | Vvi-MIR171b | AACCTCCTTCTGCTTATCT<br>TCCCACA    | GAGGGAAATCTGCTCATCTCTC<br>AAACTAA  |
| 9   | VMIRSSR171k1 | Vvi-MIR171k | ATTCCCATTCTTCTCACC<br>ACTATC      | GAGCCAACATCACAGTAACTATT<br>TCA     |
| 10  | VMIRSSR398b1 | Vvi-MIR398b | AAAGTGGATATGGTACCG<br>AAAAGTGATT  | TAGTTCTGAGGGAGAAGCTGGA<br>TGAC     |
| 11  | VMIRSSR398c3 | Vvi-MIR398c | ACGGATGTTCAACATTAA<br>TTTGGAAG    | GGCATATTTTGTAGCTTTATATAG<br>GGG    |
| 12  | VMIRSSR167d1 | Vvi-MIR167d | TATCAACCTCTCTCATGTT<br>CTTAGGGTT  | ACTAGGTAAGGAGCTTAGGGCA<br>AGG      |
| 13  | VMIRSSR828a1 | Vvi-MIR828a | AATTAACAAGAAAAAAA<br>GGGGGGAAAA   | AGAAAGAGTAAGTGAGGGAAA<br>AGGGAGA   |

| <b>Genes</b> | <b>Forward (5' to 3')</b>                  | <b>Reverse (5' to 3')</b>          |
|--------------|--------------------------------------------|------------------------------------|
| pri-miR156c  | ACAAACACACACAGAG<br>GGAGAGAGAGA            | GTATGGGAGTTACAAATGGTA<br>AGGAATAGG |
| pri-miR157c  | AAAAAAGAATAGAGAG<br>AATAGGGAGGGAT          | TAGGGACTACGGAAAGAGGA<br>AGGC       |
| pri-miR159f  | AAATTAAAAATAAAATA<br>AAATAAAATAGATGAG<br>G | AAAAGAGTAGAAGGTGTTAC<br>ATCTGCTG   |
| pri-miR160c  | CAAAAGGAAGAAGAA<br>GAAGGAAAAA              | AAAATAGAGAAGGAAAGAAT<br>GGTGGGTA   |
| pri-miR167c  | TCTCTCTCTCTCTCTCT<br>CTCTCTGTGGG           | CTAATGAGCAAGGTGGAATA<br>GGGTTT     |
| pri-miR169d  | AAATTCACAAAATATTG<br>AGTGCTTACCAAC         | AAGAGAATCAAATGTAGCCA<br>AGGACAAC   |
| pri-miR171b  | ACCGTGGATTTTTTAAG<br>GCGAGAGATAG           | TTTGTGGGAAGATAAGCAGA<br>AGGAGGT    |
| pri-miR171k  | CATCACATACCCCTCT<br>TCCTCTTCTCC            | TGGCACGGCTCAATCAAAGCT<br>AAAA      |
| pri-miR398b  | TACCTCTTGTCTCTGA<br>TTAAAACGGCG            | AAGCTGGATGACGAAGCTCT<br>GCTATG     |
| pri-miR398c  | TTAGGGAGAAGCTGGA<br>AGAAGAAGCTCT           | CGTATCCAAACCATGAACTG<br>AAAAAGT    |
| pri-miR167d  | AGTTGACCTAATAATCT<br>TTGTCAAGTTGC          | CTTTGAGAATTGAATGATGTT<br>TGGAATT   |
| pri-miR396b  | ATGGAGATGAATATTAT<br>GAGATTAGCAA           | CAGCAAGCAGAAGTCCTGAA<br>AAG        |
| pri-miR319i  | TCTCCTCTCACTATCTT<br>TCTCCTTTTT            | ATAGTTTCCAGCCTTGAAAGC<br>CAT       |
| pri-miR168   | TTCCAACCTAGAAACC<br>TGAGATCGA              | GTATGGTTCTTACGGTGGTCT<br>CTAATTC   |
| pri-miR828a  | TCTGATATCCGAAGAA<br>GAAGAAGAAGACC          | GAGTAAGTGAGGGAAAAGGG<br>AGAGAAAAAT |
| actin        | CTTGCATCCCTCAGCACCTT                       | TCCTGTGGACAATGGATGGA               |

Table S3. Characterization of microsatellites in Pri- and Pre-miRNAs sequences of grape genome.

| <b>Parameters</b>                               | <b>Pri-miRNA</b> | <b>Pre-miRNA</b> |
|-------------------------------------------------|------------------|------------------|
| Total number of sequences examined:             | 192              | 192              |
| Total size of examined sequences (bp):          | 209607           | 18993            |
| Total number of identified SSRs:                | 391              | 12               |
| Number of SSR containing sequences:             | 154              | 11               |
| Number of sequences containing more than 1 SSR: | 107              | 1                |
| Number of SSRs present in compound formation:   | 99               | 1                |

Table S4 Diversity analysis of grape heat resistance using 13 Pri-miRNA-SSR Markers.

| S1.no. | Marker       | Family            | SSR-type | Size | Start | End |
|--------|--------------|-------------------|----------|------|-------|-----|
| 1      | VMIRSSR156c1 | <i>Vv-MIR156c</i> | P2       | 40   | 514   | 475 |
| 2      | VMIRSSR157c2 | <i>Vv-MIR157c</i> | P4       | 24   | 479   | 502 |
| 3      | VMIRSSR159f2 | <i>Vv-MIR159f</i> | P5       | 20   | 479   | 498 |
| 4      | VMIRSSR160c1 | <i>Vv-MIR160c</i> | P6       | 12   | 139   | 353 |
| 5      | VMIRSSR164b1 | <i>Vv-MIR164b</i> | P4       | 12   | 205   | 216 |
| 6      | VMIRSSR167c3 | <i>Vv-MIR167c</i> | P2       | 36   | 449   | 484 |
| 7      | VMIRSSR169d1 | <i>Vv-MIR169d</i> | P6       | 12   | 813   | 824 |
| 8      | VMIRSSR171b1 | <i>Vv-MIR171b</i> | C        | 60   | 678   | 737 |
| 9      | VMIRSSR171k1 | <i>Vv-MIR171k</i> | C        | 77   | 347   | 423 |
| 10     | VMIRSSR398b1 | <i>Vv-MIR398b</i> | P4       | 16   | 419   | 434 |
| 11     | VMIRSSR398c3 | <i>Vv-MIR398c</i> | P4       | 12   | 728   | 739 |
| 12     | VMIRSSR167d1 | <i>Vv-MIR167d</i> | P6       | 12   | 67    | 78  |
| 13     | VMIRSSR828a1 | <i>Vv-MIR828a</i> | P3       | 15   | 477   | 491 |

Table S5. 8 grape germplasm resources.

| NO. | Varieties          | Type             | Location/source |
|-----|--------------------|------------------|-----------------|
| 1   | Vitis × Champion   | Wine grape       | China           |
| 2   | Shenmei            | Table grape      | China           |
| 3   | Xinya              | Wine grape       | China           |
| 4   | Shuanghong         | Wine grape       | China           |
| 5   | Beta               | Rootstocks grape | America         |
| 6   | Niagara Rosada     | Wine grape       | China           |
| 7   | Cabernet Sauvignon | Wine grape       | France          |
| 8   | Thompson Seedless  | Table grape      | China           |
