# Supplementary material
Source: MDPI journal article supplement (https://www.mdpi.com/2311-7524/9/8/931)
Supplement: s1 [file s1 › Supplemental Table S6.xlsx]

## Sheet: pri-miRNA
Table S6. Frequency distribution of different SSR repeats in Pri-miRNA sequences of grape reference genome.
ID	SSR nr.	SSR type	SSR	size	start	end
Vvi-MIR156a	1	p6	(AAAGGG)2	12	189	200
Vvi-MIR156a	2	c	(TG)6agagaga(GAGG)3gggggagagagagaggagcaatgaaacagtagcatgaaggagaagtcatgactttgtgagaggcagtggaagaa(GAGAGG)3agcaatggaacagtagcatgaaggtaaagtcttgactttgtgaggggcaatggataaagaag(GGGAGA)2	197	875	1071
Vvi-MIR156b	1	p1	(A)13	13	107	119
Vvi-MIR156b	2	c	(GCAAAA)2gcataaacttatacaattgcctctgtgtgctcactctcttctgtcagttttcaatgtgcccc(AGA)4	86	544	629
Vvi-MIR156b	3	c	(AAAT)3aaacaaccgaaaaag(GAGAAA)2	39	1074	1112
Vvi-MIR156c	1	p2	(GA)20	40	475	514
Vvi-MIR156c	2	p3	(CCT)4	12	676	687
Vvi-MIR156c	3	p2	(GA)8	16	874	889
Vvi-MIR156c	4	p6	(TCACCT)2	12	1014	1025
Vvi-MIR156d	1	p6	(ATTTTA)2	12	245	256
Vvi-MIR156d	2	p6	(GCAGAA)2	12	470	481
Vvi-MIR156e	1	p1	(A)22	22	157	178
Vvi-MIR156e	2	p6	(AGAGAC)2	12	342	353
Vvi-MIR156e	3	p2	(GA)7	14	497	510
Vvi-MIR156e	4	p6	(AAGAAA)2	12	958	969
Vvi-MIR157a	1	p6	(TGATGC)2	12	217	228
Vvi-MIR157a	2	p6	(TTCTCT)2	12	696	707
Vvi-MIR157b	1	c	(TG)7taac(AG)11ggagggaaggaggaagaggtagaggaagagggagtatggtggttagttttgtaagggaaccaa(ACAGAG)2	115	662	776
Vvi-MIR157c	1	p6	(ACCAAA)2	12	357	368
Vvi-MIR157c	2	p4	(AGGG)6	24	479	502
Vvi-MIR159a	1	p1	(A)14	14	484	497
Vvi-MIR159a	2	c*	(GAAAAT)1(GA<AAAT>)(AAAT)3	24	1111	1134
Vvi-MIR159b	1	p4	(AAAT)4	16	5	20
Vvi-MIR159b	2	c	(TTGGGT)2catctcatctaaaaaataaattggtgtttagtttacaaaagcggcattgttgccattccaacactcatcttaacatattcga(ATT)4	106	358	463
Vvi-MIR159b	3	p6	(AAAAAT)2	12	1113	1124
Vvi-MIR159c	1	p3	(TGA)5	15	487	501
Vvi-MIR159d	1	p2	(AT)12	24	79	102
Vvi-MIR159d	2	c*	(AAATAA)1(A<AATAA>TAATAATAACAATAATAATAATAATAAAAACCCTTCTATTCTATCATTTGATTTTAGAAGGAAAATCCAAATACCAATACACTAAAAACTTAGAATACATATTGAGTGTGAAGAATAGACACAAAGAGAAAGACGAAAGATATGAACATGAATGTTATTTCTTTCAATAAACGTATAGAAAAAATTTACTTTCTTTTTTTGAAGAAAAAAACCCATAGTTCATAAAATAAAAATCAAGAAATGAATCAAAACATTTTCTGAAGGATGTTAGAAGTAAGAACCATAGAGCTCCCTTCACTCCAATACCAGAAAGATCAAAGTACCCTCATCTCCCAAGTCATGCTCACCCATAGCTTGCTCTCACCATATGCTAGAACTTGA…	37	225	261
Vvi-MIR159e	1	p6	(AATGAG)2	12	498	509
Vvi-MIR159e	2	c	(CTTTTC)2ttacaagaacaattcaaaattcaatgaa(AT)6	52	964	1015
Vvi-MIR159f	1	p4	(ATTA)3	12	251	262
Vvi-MIR159f	2	p5	(AAAAT)4	20	479	498
Vvi-MIR159f	3	p6	(CTTTTC)2	12	963	974
Vvi-MIR160b	1	p6	(TTCTTT)2	12	830	841
Vvi-MIR160c	1	p6	(CATTTA)2	12	273	284
Vvi-MIR160c	2	c	(GAA)4gg(A)15(GAACA)3	44	458	501
Vvi-MIR160c	3	c*	(T)15(<T>AT)(TAT)3	27	768	794
Vvi-MIR160c	4	p6	(GAAAGA)2	12	898	909
Vvi-MIR160d	1	p6	(AGGAAA)2	12	34	45
Vvi-MIR160d	2	c	(GTCAGT)2gtaatgaattttgcatttaatcatttctgattca(TTCAGC)2	58	430	487
Vvi-MIR160e	1	c	(CAACCC)3caaaaccatttccatc(TTCTCT)2	46	6	51
Vvi-MIR160e	2	c	(CTC)5tcctcctc(CTCA)3	35	305	339
Vvi-MIR162	1	p2	(CT)6	12	304	315
Vvi-MIR162	2	p6	(TGTTTT)2	12	438	449
Vvi-MIR164a	1	p2	(TA)13	26	63	88
Vvi-MIR164a	2	p6	(AAGAGA)2	12	736	747
Vvi-MIR164b	1	p4	(ATTC)3	12	205	216
Vvi-MIR164c	1	p5	(TTTTC)3	15	1156	1170
Vvi-MIR164d	1	c	(TTC)6acacccccaatgtcatgaacttaggtgtttgctaagcactcttat(ATGA)3agacgaagagaaagcccatgtgtagtatttatac(ACACAA)2	121	653	773
Vvi-MIR164d	2	p1	(A)14	14	956	969
Vvi-MIR166a	1	c	(TC)9tttcct(CTCTCA)2	36	716	751
Vvi-MIR166a	2	p2	(AG)14	28	866	893
Vvi-MIR166b	1	c*	(A)12tatttgtgaaattttga(TTTATT)2tcttcaaatatttatcatattttt(TAAAA)3(AAAATA)2*	83	39	121
Vvi-MIR166b	2	p6	(TTTAGA)2	12	437	448
Vvi-MIR166b	3	c	(TC)7c(CT)21	57	835	891
Vvi-MIR166b	4	p6	(TGAAGT)2	12	1090	1101
Vvi-MIR166c	1	p6	(AGAAAA)2	12	143	154
Vvi-MIR166c	2	p6	(AGCCTT)2	12	702	713
Vvi-MIR166c	3	p6	(CCCAGA)2	12	925	936
Vvi-MIR166d	1	p4	(TTTC)4	16	721	736
Vvi-MIR166d	2	c	(TGACTC)2atccccc(TTCCAA)2tctttcaaaacgacaccgttggattttgggagaaaaaggaaagaaaacatcatgattatcaact(ATTCCC)3attct(CATTCC)2	130	978	1107
Vvi-MIR166e	1	p2	(TC)12	24	391	414
Vvi-MIR166f	1	p6	(TAATTT)2	12	2	13
Vvi-MIR166f	2	c	(CATTTG)2tcttcttgtatttgactctactccaaactggttgtagcaggtagcaggtgggttggttcacctacaccagcaggtcacaaca(AAAT)6	118	183	300
Vvi-MIR166f	3	c	(CCT)4cttcttcatcttccccgcgtgaaggttgggttgagaggaatgttgtctggctcgaggtatcatttat(TTTTC)3ttcgggtttttgttggattgaatttaacccccaaat(GAAA)3	142	630	771
Vvi-MIR166f	4	p1	(T)12	12	1017	1028
Vvi-MIR166g	1	p6	(TAGTGA)2	12	909	920
Vvi-MIR166h	1	c	(AG)6g(GA)10ggaagagagagagaaactg(TTTGAT)2	64	616	679
Vvi-MIR167b	1	p3	(GAA)4	12	415	426
Vvi-MIR167b	2	p4	(TTCT)3	12	841	852
Vvi-MIR167c	1	p2	(AG)6	12	6	17
Vvi-MIR167c	2	p2	(TC)6	12	252	263
Vvi-MIR167c	3	p2	(CT)18	36	449	484
Vvi-MIR167c	4	p1	(A)13	13	1087	1099
Vvi-MIR167d	1	p6	(TTTTCC)2	12	67	78
Vvi-MIR167d	2	p6	(AACAAG)2	12	678	689
Vvi-MIR168	1	c	(ACACCA)2catggttttcacatagttgaatgaagcaacattagaaattcaacgaaagag(A)18	81	133	213
Vvi-MIR168	2	p1	(A)14	14	1020	1033
Vvi-MIR169c	1	p6	(TTTATT)2	12	884	895
Vvi-MIR169d	1	p6	(TCTTTT)2	12	813	824
Vvi-MIR169g	1	p4	(TCCA)3	12	271	282
Vvi-MIR169h	1	p4	(TCCA)3	12	271	282
Vvi-MIR169i	1	p6	(TCCTCT)2	12	611	622
Vvi-MIR169i	2	p6	(TTTCTT)2	12	825	836
Vvi-MIR169j	1	c	(TC)8ctttagcactgtgggtgcatgcttaggacttagcagagacccaagtctatcatatatagtaattatgatgctgcc(T)14	105	97	201
Vvi-MIR169j	2	c	(CTTT)5ctgta(TTTC)3	37	812	848
Vvi-MIR169j	3	p2	(AT)16	32	1023	1054
Vvi-MIR169k	1	p4	(CTTT)3	12	808	819
Vvi-MIR169k	2	p2	(AT)6	12	1008	1019
Vvi-MIR169l	1	p6	(TATTTT)3	18	1070	1087
Vvi-MIR169m	1	p6	(TTTTTC)2	12	1007	1018
Vvi-MIR169p	1	p6	(GGATAT)2	12	211	222
Vvi-MIR169p	2	c	(TTTTC)4ttttttg(T)16	43	1004	1046
Vvi-MIR169q	1	p4	(TTTA)3	12	824	835
Vvi-MIR169q	2	p6	(TTTGAA)2	12	1077	1088
Vvi-MIR169s	1	c	(TAAT)4ttactcttttttttccttgcatatttaggtgtccttttgaatgtactttttat(TTTTTA)2	81	812	892
Vvi-MIR171a	1	p6	(GGAAAA)2	12	233	244
Vvi-MIR171a	2	p3	(AGA)4	12	448	459
Vvi-MIR171a	3	c	(AAATTG)2gtttcactaatagtgattgatgtcacataaaaatagtgattggaaggtctagtagcctg(CTT)4	83	874	956
Vvi-MIR171b	1	c	(ATGTGT)2gagagagcgcttccctcatatttgaacagtctctac(AG)6	60	678	737
Vvi-MIR171c	1	p6	(ATGTGG)2	12	917	928
Vvi-MIR171d	1	p3	(TGC)5	15	470	484
Vvi-MIR171d	2	c	(TCTGAG)2ccaagcctgaagcaatcaatttttgtatttatgaagttggggataccatatgctatggtgtggtgccatatccc(ATTTGA)2	98	831	928
Vvi-MIR171e	1	c	(T)15ccatcttgatgttgattgctcgagaaaaaggagcttctttt(TC)6(TTTCTC)2	80	894	973
Vvi-MIR171f	1	p3	(ATT)5	15	2	16
Vvi-MIR171f	2	p3	(TTC)4	12	208	219
Vvi-MIR171f	3	p4	(ACCT)3	12	703	714
Vvi-MIR171f	4	p6	(TACATG)2	12	1094	1105
Vvi-MIR171i	1	p6	(TTCTCT)2	12	376	387
Vvi-MIR171j	1	c	(TTCAAA)2tgggatatggcaccacaccatagcatatggtatccccaacttcataaatacaaaaattgattgcttcaggcttgg(CTCAGA)2	99	184	282
Vvi-MIR171j	2	p3	(GCA)4	12	629	640
Vvi-MIR171k	1	c	(TCTTTT)2(TC)6tgtttctactcct(TCGCCA)2tcaccatcacataccc(CCTCTT)2	77	347	423
Vvi-MIR171k	2	c	(TTTC)3gaatattttaattgtatcataataaattataaaattacatataatagcagaaaaattaatagcatactttttattttcttgaa(TATTTT)2	107	904	1010
Vvi-MIR172a	1	p6	(AATCAA)2	12	40	51
Vvi-MIR172a	2	p1	(T)24	24	208	231
Vvi-MIR172a	3	p1	(T)15	15	900	914
Vvi-MIR172b	1	p6	(AAGAAA)3	18	403	420
Vvi-MIR172b	2	p1	(A)18	18	944	961
Vvi-MIR172c	1	p6	(TGGTGA)2	12	563	574
Vvi-MIR172c	2	p1	(A)15	15	811	825
Vvi-MIR172c	3	p2	(TC)6	12	1111	1122
Vvi-MIR172d	1	p1	(T)13	13	172	184
Vvi-MIR172d	2	c	(GGTTGT)2gtttttaggctacctccgtttggttgctgagaaaatcgaggacaagcaaagcaaacttacaacttccagta(ATGGGC)2	95	955	1049
Vvi-MIR172e	1	p6	(CTTTTT)2	12	298	309
Vvi-MIR172e	2	p6	(TTAGGG)2	12	440	451
Vvi-MIR319b	1	p5	(TTTTC)3	15	404	418
Vvi-MIR319c	1	p2	(GA)11	22	774	795
Vvi-MIR319c	2	p6	(AAATAC)2	12	1045	1056
Vvi-MIR319d	1	p6	(AATGGA)2	12	76	87
Vvi-MIR319e	1	p6	(TGCTGT)2	12	218	229
Vvi-MIR319e	2	p2	(TA)17	34	665	698
Vvi-MIR390a	1	c	(AAAT)3cataaaagagaaaggaggaa(AAAAT)4	52	232	283
Vvi-MIR390a	2	c	(TTTTTG)2tattttttttcgaagggctaaagggactgttcttggtttgatttcagtagggtaaggatga(GCTGTG)2	85	940	1024
Vvi-MIR390b	1	c	(AAAT)3cataaaagagaaaggaggaa(AAAAT)4	52	232	283
Vvi-MIR390b	2	c	(TTTTTG)2tattttttttcgaagggctaaagggactgttcttggtttgatttcagtagggtaaggatga(GCTGTG)2	85	940	1024
Vvi-MIR391	1	p6	(CAAAAG)2	12	929	940
Vvi-MIR393a	1	c	(ATA)4aggagaaaaaattcttcaaatgggaaatcaacctatagagatgtgcttttgctgtgttgagaaaaatctgcagaaagtcaattttattctatt(TTTA)5	125	111	235
Vvi-MIR393a	2	c	(CAA)4gaagaagaggagctagaaaggcggtggtccgtggagacatatggtggaagtggtgtgttttaatgggggagattgtgatcaaaaggtggtga(TGGGTT)2ttgatttatagaaagggagaagacaaagag(AGAGAA)3agaaaaaaagagagagaaagtgaaaagagaagaaacaggagaggagaagaaagaaa(GGTT)3	232	641	872
Vvi-MIR393a	3	c	(T)17attatgtaattcttataatatc(A)13	52	1078	1129
Vvi-MIR393b	1	p6	(GAAAGA)2	12	443	454
Vvi-MIR393b	2	c	(CCCTTA)2tttggag(ATTTTT)2	31	967	997
Vvi-MIR394a	1	c	(AAAAAT)2aaaaacaaaatgcaattttgatagtgggactttctgaggaaattgagatcagttacctttct(TTTC)3(T)14	100	714	813
Vvi-MIR394a	2	p6	(GGTGAT)2	12	992	1003
Vvi-MIR394b	1	p4	(AAAT)3	12	336	347
Vvi-MIR394b	2	p6	(ACACCC)2	12	1041	1052
Vvi-MIR394c	1	p6	(GTTTTT)2	12	766	777
Vvi-MIR395a	1	p4	(AAAT)3	12	1080	1091
Vvi-MIR395c	1	p6	(TTAATG)2	12	935	946
Vvi-MIR395e	1	p6	(TGAGAT)2	12	87	98
Vvi-MIR395f	1	p2	(TA)7	14	620	633
Vvi-MIR395f	2	c*	(TTTTTA)1(TT<TTTA>)(TTTA)2	20	973	992
Vvi-MIR395g	1	p4	(AGCA)4	16	483	498
Vvi-MIR395g	2	c	(TTAATT)2tattttccaatacctttttatcattatttatttg(TTTA)3	58	803	860
Vvi-MIR395g	3	c	(TACACC)2aatct(AATAGA)2	29	1020	1048
Vvi-MIR395h	1	p6	(ACATTA)2	12	172	183
Vvi-MIR395i	1	p6	(ACATTA)2	12	172	183
Vvi-MIR395j	1	c	(AACCCT)2aaaacccatttaaaacaataagactcggcccat(TTAGCC)2	57	36	92
Vvi-MIR395j	2	p5	(TTTTA)3	15	976	990
Vvi-MIR395k	1	c	(GAATGT)2ggcctaaacagcacgcaagatgatgagaagagaataatatcatgcctagtgggcagaagttccc(TGAGAT)2	88	11	98
Vvi-MIR395l	1	c	(GAATGT)2ggcctaaacagcacgcaagatgatgagaagagaataatatcatgcctagtgggcagaagttccc(TGAGAT)2	88	11	98
Vvi-MIR395o	1	p4	(TTAT)3	12	840	851
Vvi-MIR395o	2	p6	(TACACC)2	12	979	990
Vvi-MIR395p	1	p6	(TGAGAT)2	12	75	86
Vvi-MIR396a	1	c	(A)14(TA)15tgggaaaatgataatatatcaaaatacaaagaaaaaaaaggtagctaaactttaggtaaaaaaaaaaggggaaa(AAAACT)2	130	252	381
Vvi-MIR396a	2	c	(AG)8ggaga(GAGG)7gat(GGAGAG)5	82	756	837
Vvi-MIR396a	3	p6	(ATACAT)2	12	1087	1098
Vvi-MIR396b	1	c*	(GATGGG)1(GATGGGATGGGATGTGAGATGGCTTGGCTTTCAAAATTTTTTTTTTCTCTTTTGGGTATGTTTTTTTTTATTTAATTTATTTTTTATGACATTATTTTCTGACGTAGCCCTCATACCCCACTGAGCACTCACAACAAAAGTAGGTACGTTGTGGGTAAAATGGGCCTTGTGAGCGAAGTGAACCCACGAGACTCACCCTCACTTCAACTCCCTTGCACCCTCTCTATAAAGCTGGTAGAGAGATTATGTGATAGTGTGGTCCATGAGAGAAATTGTATGGGCATGCTTCATTTCATCATCTCCTTCCTTTCTCTTCCTCCTCTTTCTTTCCATCTTAATATTAACGTCACGGTGGAAATTAAAGACATGTGAGAGTGAGAGTGAGAGTG…	19	51	69
Vvi-MIR396b	2	p6	(GTGAGA)4	24	425	448
Vvi-MIR396b	3	c	(AGAAAA)2aaagtttagatctgtctgttgaattgcctgaattatgtcaagagatggaaccccatgaagagaaaaaggtaaaaacaattcagaaaca(TTTCTT)2	112	950	1061
Vvi-MIR396c	1	p6	(TGGAAG)2	12	565	576
Vvi-MIR396c	2	c	(TTTTAA)2aatagttttttattagttttcttgcaacacaaattcttattttttc(A)12	70	860	929
Vvi-MIR396d	1	p3	(GAC)7	21	648	668
Vvi-MIR396d	2	p3	(ATT)5	15	933	947
Vvi-MIR396e	1	p6	(ATGGTC)3	18	7	24
Vvi-MIR396e	2	c	(AGA)4aggagaaatctacattcctcttaggagat(AAG)5	56	398	453
Vvi-MIR396f	1	c	(ATTTTC)2cattgctaaatcttagtcttggttttattttctttcttctctccttttcttccgtatttttcc(TTTCGT)2atttttcggaattttgacctaatatctttgaaattttggaatacgagaagatagggtttagactttggaggaaagagagagaaag(TTGTGT)2gtgaaacgcgaagaactgaagaagatggaaaggtcgtttgcatgcttttccacggctttcttgaacttggaacttaggtgtgcttctctc(TCT)6	292	289	580
Vvi-MIR397	1	p6	(TTTTCT)2	12	72	83
Vvi-MIR397	2	p4	(AAGG)4	16	391	406
Vvi-MIR397	3	c	(AT)11gtttatatggtagagtaggcttttgaagtgaagtacagggacttgtattcaaatgtactgccattttacaaagcccaactatg(GCT)5	120	705	824
Vvi-MIR398a	1	p6	(ATTTTT)2	12	759	770
Vvi-MIR398b	1	p4	(ATAA)4	16	419	434
Vvi-MIR398b	2	p6	(AAACCC)2	12	1076	1087
Vvi-MIR398c	1	p6	(TTAAAC)2	12	55	66
Vvi-MIR398c	2	p6	(AAACTC)2	12	346	357
Vvi-MIR398c	3	p4	(TTAT)3	12	728	739
Vvi-MIR399b	1	p6	(TTGCAT)2	12	3	14
Vvi-MIR399b	2	p2	(TA)8	16	379	394
Vvi-MIR399b	3	p6	(CTTCCT)2	12	643	654
Vvi-MIR399b	4	p6	(TTTGCT)2	12	1065	1076
Vvi-MIR399c	1	p6	(TTGCTG)2	12	124	135
Vvi-MIR399c	2	p5	(AAAAT)4	20	323	342
Vvi-MIR399c	3	p6	(TCAACA)2	12	983	994
Vvi-MIR399d	1	p6	(TTGCTG)2	12	124	135
Vvi-MIR399d	2	p5	(AAAAT)4	20	323	342
Vvi-MIR399d	3	p6	(TCAACA)2	12	983	994
Vvi-MIR399e	1	p6	(TTTTAT)2	12	660	671
Vvi-MIR399e	2	p2	(AT)12	24	818	841
Vvi-MIR399f	1	p1	(A)16	16	1098	1113
Vvi-MIR399h	1	p6	(CATGCA)2	12	497	508
Vvi-MIR399h	2	p6	(TTTCTT)2	12	687	698
Vvi-MIR403a	1	p3	(ATT)4	12	150	161
Vvi-MIR403a	2	p6	(TTTTTC)2	12	1073	1084
Vvi-MIR403b	1	c	(ATAAAA)2aaaatatttaaaaataatttaaattttatgcatggtaaaattagatggtacttgaatagttaaatctaatatctttaaagataaattgtagaaaattt(TAAA)3(TTAAAT)2	134	59	192
Vvi-MIR403b	2	p6	(GAGTTC)2	12	751	762
Vvi-MIR403c	1	p6	(AAGGTT)2	12	53	64
Vvi-MIR403c	2	p6	(ATCAAT)2	12	192	203
Vvi-MIR403c	3	p6	(TTTTTC)2	12	1096	1107
Vvi-MIR403d	1	p6	(ATAAAA)2	12	71	82
Vvi-MIR403d	2	p4	(TAAA)3	12	189	200
Vvi-MIR403d	3	c	(T)12caggtttgagacttgagagtttaccattatgtggcttgttgttgcagatcccaccgttatgacgtacggtggca(GAGTTC)2	98	644	741
Vvi-MIR403d	4	p4	(AAAT)4	16	848	863
Vvi-MIR403e	1	p6	(ATAATT)2	12	210	221
Vvi-MIR403e	2	p6	(TTTTTC)2	12	1079	1090
Vvi-MIR403f	1	c	(GGAAAA)2aggaaaatttcaaacaaaaaaag(AAAAGA)2	47	280	326
Vvi-MIR403f	2	p6	(CATCTT)2	12	632	643
Vvi-MIR408	1	p4	(AAAG)3	12	174	185
Vvi-MIR408	2	c	(CTTTTT)2cttttattgatctctgtgtattaaattattaatcatactctgcttttagattttggaacttcca(TGAAAT)2	88	629	716
Vvi-MIR477a	1	p1	(A)12	12	398	409
Vvi-MIR477b	1	p6	(TGGCCA)2	12	385	396
Vvi-MIR477b	2	p4	(AAAT)3	12	839	850
Vvi-MIR479	1	p4	(ATCG)3	12	57	68
Vvi-MIR482	1	p6	(AAAAAT)2	12	373	384
Vvi-MIR530a	1	p6	(TATTTG)2	12	516	527
Vvi-MIR530a	2	c	(TTCAAG)2atatgaaaaaataggcctcacatttca(TATT)3ttttctctaccatttttcttgttttgcttcctctacccatcatgttgttaagtgtgttttttatttttttgtttgcatgtt(TA)8tggactacttattactatttaataataatttgatataaggtg(GAGAAA)2	202	747	948
Vvi-MIR530b	1	p3	(TGG)4	12	12	23
Vvi-MIR530b	2	p2	(CT)7	14	333	346
Vvi-MIR530b	3	p6	(TGCACC)2	12	528	539
Vvi-MIR530b	4	p6	(AATCAT)2	12	740	751
Vvi-MIR530c	1	c	(AGAAAA)2aggaaaaacactagggactgataaa(AGGTGC)2aaatgcagataaatgatacaagctgaaccctaagcaaaaacttttt(CCTGAG)2agaggctagagatgacagc(GAGCTT)2tatacggagaaacagtgagtccagaggcaattaaagtagtatgtatattagagtg(GA)6	205	609	813
Vvi-MIR535b	1	p6	(ATATCT)2	12	972	983
Vvi-MIR535d	1	p1	(T)18	18	793	810
Vvi-MIR535e	1	p1	(T)12	12	789	800
Vvi-MIR535e	2	p6	(AAAACA)2	12	1000	1011
Vvi-MIR535f	1	p6	(ATATCT)2	12	972	983
Vvi-MIR535g	1	p1	(T)15	15	793	807
Vvi-MIR535h	1	p1	(A)19	19	314	332
Vvi-MIR535i	1	p6	(TAGATA)2	12	137	148
Vvi-MIR535j	1	p6	(TAGATA)2	12	137	148
Vvi-MIR535k	1	p1	(A)13	13	187	199
Vvi-MIR536	1	p4	(AAAT)4	16	168	183
Vvi-MIR827	1	p1	(G)15	15	460	474
Vvi-MIR827	2	p6	(ATCTAT)2	12	1094	1105
Vvi-MIR828a	1	p3	(GAA)5	15	477	491
Vvi-MIR1446	1	p6	(AGTGGT)2	12	114	125
Vvi-MIR1446	2	p3	(GCT)5	15	329	343
Vvi-MIR2111	1	p2	(AT)24	48	310	357
Vvi-MIR2111	2	p4	(AGAA)4	16	635	650
Vvi-MIR2118	1	p1	(T)23	23	30	52
Vvi-MIR2118	2	p1	(A)15	15	247	261
Vvi-MIR2118	3	p6	(ACTTGA)2	12	690	701
Vvi-MIR2275a	1	p4	(AATA)4	16	248	263
Vvi-MIR2275a	2	p1	(T)19	19	909	927
Vvi-MIR2275b	1	c*	(TTAAAA)1(TT<AAAA>AAAAAAAATTCCATGAATCTCGTACTATGTTCTTTTCTACTTTTGCTTTTATTTACTTT)(A)11	20	1046	1065
Vvi-MIR3623	1	c	(ATATAA)3atggacgtgttagagtttcagcagtacagcgtcacgtggtagagtttcagtagtacagcatcacgttgtagactttcaagatat(ATATAA)2	114	87	200
Vvi-MIR3623	2	p6	(GGTTGT)3	18	472	489
Vvi-MIR3623	3	p4	(CTTT)3	12	717	728
Vvi-MIR3624a	1	p5	(TTTTA)5	25	23	47
Vvi-MIR3625	1	p6	(TTATTT)2	12	190	201
Vvi-MIR3626	1	c	(TTA)4c(TAT)4	25	83	107
Vvi-MIR3626	2	p1	(T)16	16	309	324
Vvi-MIR3629a	1	p5	(TCAGT)3	15	751	765
Vvi-MIR3629a	2	p6	(AGCTCA)2	12	1132	1143
Vvi-MIR3629b	1	c	(CATTCG)2cacctttctctgtttggttgttccgaaagtaaaaggaaagcgaggaaaaggcgagaaaaagaaagattgttgttttttttttcttttacg(GTGCAA)2	114	136	249
Vvi-MIR3629b	2	p1	(T)18	18	389	406
Vvi-MIR3629b	3	p6	(TTTTTC)2	12	747	758
Vvi-MIR3629c	1	p6	(TTTCCT)2	12	600	611
Vvi-MIR3629d	1	p1	(A)18	18	603	620
Vvi-MIR3629d	2	p6	(TCATAA)2	12	733	744
Vvi-MIR3631b	1	p6	(TAGAAG)2	12	727	738
Vvi-MIR3631c	1	p6	(AAATAA)2	12	413	424
Vvi-MIR3631c	2	p6	(ATTTAT)2	12	676	687
Vvi-MIR3631d	1	p6	(AAAATT)2	12	70	81
Vvi-MIR3631d	2	c	(AAATAA)2tattaaa(TTAAAC)2	31	877	907
Vvi-MIR3631e	1	p1	(T)14	14	15	28
Vvi-MIR3631e	2	p4	(AAAT)3	12	1101	1112
Vvi-MIR3632	1	p2	(TA)6	12	1101	1112
Vvi-MIR3633a	1	p1	(T)15	15	685	699
Vvi-MIR3633a	2	p6	(TTTTTA)2	12	825	836
Vvi-MIR3633a	3	c*	(AAAT)2(<AAAT>A)(AAATA)2(AAAT)3*	30	941	970
Vvi-MIR3633b	1	p6	(TATATT)2	12	79	90
Vvi-MIR3633b	2	p1	(T)15	15	1041	1055
Vvi-MIR3634	1	p6	(GAGGGA)2	12	491	502
Vvi-MIR3635a	1	p6	(GATTTG)2	12	1007	1018
Vvi-MIR3635b	1	p6	(GATTTG)2	12	1006	1017
Vvi-MIR3636	1	p2	(TA)9	18	21	38
Vvi-MIR3636	2	p6	(AAACAT)2	12	157	168
Vvi-MIR3636	3	p3	(ACC)4	12	765	776
Vvi-MIR3639	1	p6	(GTATTA)2	12	193	204

## Sheet: pre-miRNA
Table S6. Frequency distribution of different SSR repeats in Pre-miRNA sequences of grapevine.
ID	SSR nr.	SSR type	SSR	size	start	end
Vvi-MIR156b	1	p6	(TGCTTT)2	12	44	55
Vvi-MIR172c	1	p6	(TGGTGA)2	12	44	55
Vvi-MIR319d	1	p6	(AATGGA)2	12	76	87
Vvi-MIR390b	1	p6	(ATTTTT)2	12	36	47
Vvi-MIR396c	1	p6	(CTTCCA)2	12	32	43
Vvi-MIR396f	1	p3	(TCT)6	18	44	61
Vvi-MIR530a	1	p6	(TGCACC)2	12	7	18
Vvi-MIR530b	1	p6	(TGCACC)2	12	9	20
Vvi-MIR530c	1	c	(TGCACC)2ttttatcagtccctagtgtttttc(CTTTTT)2	48	9	56
Vvi-MIR3629c	1	p6	(TTTCCT)2	12	81	92
Vvi-MIR3629d	1	p1	(A)18	18	84	101

## Sheet: MIR167s
ID	SSR nr.	SSR type	SSR	size	start	end
Sly-MIR167a	1	p2	(TA)14	28	888	915
Sly-MIR167b	1	c	(CCTA)3tatacatatataatagctattttatttcacattttaattaatttttgcctacacatttggctttaatatatccttcatttcttatcacttctatat(ATAA)3	120	264	383
Sly-MIR167c	1	c	(GGCGTG)2attatattcaacttgtctcactatatgctatattagctatatatatat(TA)33	126	71	196
Sly-MIR167c	2	p2	(TA)16	32	379	410
Sly-MIR167c	3	p4	(TATT)3	12	1036	1047
Sly-MIR167d	1	p6	(TATTTT)2	12	18	29
Sly-MIR167d	2	p3	(TCT)5	15	456	470
Ath-MIR167a	1	p4	(AAAG)4	16	71	86
Ath-MIR167a	2	p6	(TCTCTT)2	12	465	476
Ath-MIR167b	1	p2	(GA)11	22	4	25
Ath-MIR167b	2	p2	(CT)7	14	149	162
Ath-MIR167c	1	c	(TCT)7ccttcatgctacaatcattagcaggtgaaactaccagcatgacctag(TC)7	82	475	556
Osa-MIR167a	1	p2	(TC)9	18	2	19
Osa-MIR167a	2	c	(TAGC)3catctctcc(TCT)8	45	224	268
Osa-MIR167a	3	p6	(TGTAGC)2	12	373	384
Osa-MIR167b	1	p6	(ATAGAA)2	12	190	201
Osa-MIR167b	2	c	(TCGAT)3cgacattgacactctctcgcgcacccagctagctgctcgtttataaagacggcgaatccatcgacgaagaagaagac(GAG)7gggatcgagcggtgacatgcacatgggggggcagatggatg(GATC)3ggcggcgtagtttatcgcggccatgtcgctggcc(AGG)5aatccgagaggcgatggcagc(GTGCGG)2gtgtgtcgccaatgagcggcaagtcaaagggcggggtgggcacatgcgac(AGTGGG)2	310	673	982
Osa-MIR167b	3	p1	(T)15	15	1102	1116
Osa-MIR167c	1	p3	(TAG)6	18	105	122
Osa-MIR167d	1	p4	(TAGC)3	12	55	66
Osa-MIR167d	2	c	(CA)10c(GA)22	65	787	851
Osa-MIR167e	1	p6	(GAAGGA)2	12	838	849
Osa-MIR167f	1	p4	(CTAG)3	12	473	484
Osa-MIR167f	2	p2	(GA)19	38	640	677
Osa-MIR167f	3	p6	(TATGAA)2	12	1059	1070
Osa-MIR167g	1	p1	(A)13	13	294	306
Osa-MIR167g	2	p4	(TTGA)3	12	605	616
Osa-MIR167g	3	c	(TTCAGC)2tttttttaatttgctccttgagatagcaaatcaagatctagggctttctggaggagatgaagtcgtgtacatgttcttagattgcgatcttggtag(TTTGTT)2tctgcagatcgagtgcaaatatatgtcttttagatctgcat(ATATTG)2	173	720	892
Osa-MIR167h	1	p6	(TGGGTT)2	12	157	168
Osa-MIR167h	2	c	(TC)6ttcttcctcctctcctccatgaaagctagggaaattaactaagggcagtggtgcaccacaagttggtgaagctgccagcatgatc(TGA)5	112	442	553
Osa-MIR167h	3	p6	(TTGGAT)2	12	933	944
Osa-MIR167i	1	p4	(GATC)3	12	168	179
Table S6. Frequency distribution of different SSR repeats in miR167 family members of nine species.
Vvi-MIR167b	1	p4	(TTCT)3	12	841	852
Vvi-MIR167c	1	p2	(AG)6	12	6	17
Vvi-MIR167c	2	p2	(TC)6	12	252	263
Vvi-MIR167c	3	p2	(CT)18	36	449	484
Vvi-MIR167c	4	p1	(A)13	13	1087	1099
Vvi-MIR167d	1	p6	(TTTTCC)2	12	67	78
Vvi-MIR167d	2	p6	(AACAAG)2	12	678	689
Stu-MIR167a	1	p4	(ATAA)3	12	869	880
Stu-MIR167b	1	p5	(ATAAA)3	15	10	24
Stu-MIR167b	2	p6	(GGCGTG)2	12	161	172
Stu-MIR167b	3	c	(TGTTTC)2aattgcatattcctttctatactaaaagtgaatcccttttgacttcttttttttatg(T)13	82	1029	1110
Stu-MIR167d	1	p6	(TAAATT)2	12	51	62
Stu-MIR167d	2	p3	(TCT)6	18	455	472
Stu-MIR167d	3	p4	(GAAA)3	12	659	670
Gma-MIR167a	1	p6	(GAATTT)2	12	8	19
Gma-MIR167a	2	c	(CAAAAA)2gaatatgtgcatgtgtatctgttgatgttgtaaacatagcaaaatctatgcattcagtatc(TGTTGA)2	85	658	742
Gma-MIR167b	1	p2	(TA)8	16	392	407
Gma-MIR167d	1	p6	(ATAAAA)2	12	158	169
Gma-MIR167d	2	c*	(AATATA)1(A<ATATA>TATATATATATATATATATATATATATATATATATATATATATATATATATATATATATATATATATTTGCTGATAAAAAAATTAATGTCTTCTTTTATAACTCTAGGTTAAATAATTTGTTTGTCATCGAGAATCAAGGTGAAACAACACATGTCAATACTATTTCTATTGAATCAACACATGACAAAAAAGAATGTAATGAATCTATTTATAGTAATTTATTAGTGGTGCATAATTTAGTGATCTTTTTGCAGTAAAAAAAATGTGATCTTTTCATCTCATTATGTCATAGGTAAAAAAAAGAATTCAACTATTAACATACAAAAATAAACTAGGCAGTAAATTTAGCTATTCGACTTCCACAAATTTTTTACTTTGTA…	79	328	406
Gma-MIR167e	1	p5	(AAAAT)3	15	392	406
Gma-MIR167e	2	p6	(TATTTT)2	12	739	750
Gma-MIR167e	3	p6	(AAGAGC)2	12	1037	1048
Bra-MIR167a	1	p1	(T)12	12	800	811
Bra-MIR167a	2	p2	(TA)13	26	1049	1074
Bra-MIR167c	1	p6	(TGAATT)2	12	106	117
Bra-MIR167d	1	p4	(AAAT)3	12	126	137
Bra-MIR167d	2	p2	(GA)17	34	650	683
Zos-MIR167a	1	p6	(AAAAAT)2	12	48	59
Zos-MIR167a	2	p6	(AAAAAC)2	12	420	431
Zos-MIR167a	3	p6	(GAAAAG)2	12	673	684
Zos-MIR167b	1	c	(GAA)6aaatacagtggtcc(CAAAAA)2	44	769	812
Sit-MIR167b	1	p2	(TA)9	18	40	57
Sit-MIR167b	2	p2	(GA)7	14	671	684
Sit-MIR167c	1	c	(C)16(TC)11	38	416	453
Sit-MIR167d	1	p6	(ATGCAT)2	12	92	103
Sit-MIR167d	2	p6	(GATGCT)3	18	962	979
Sit-MIR167e	1	c*	(G)16(<G>A)(GA)15ttagcaattagcattggcgtgcggcttgatggtgtgggggctgttggagattatgtaggactttttatggagtccttttcggtgtaatct(TTTG)3	150	701	850
Sit-MIR167f	1	p4	(CTGC)3	12	297	308
Sit-MIR167f	2	p4	(GCAT)3	12	685	696
Sit-MIR167g	1	p3	(CTT)6	18	247	264
Sit-MIR167h	1	p6	(GGCGAG)2	12	730	741
Sit-MIR167i	1	p2	(CG)8	16	105	120
Sit-MIR167i	2	p6	(CCGTGA)2	12	415	426
Sit-MIR167j	1	p6	(GTTGGT)2	12	828	839
